# Supplementary material for: Activity of Adagrasib (MRTX849) in Brain Metastases: Preclinical Models and Clinical Data from Patients with KRASG12C-Mutant Non–Small Cell Lung Cancer
Source: Oxford University Press journal article supplement (doi:10.1158/1078-0432.ccr-22-0383), 2022-04-11
Supplement: ccr-22-0383_figure_s1_suppfs1.docx [file ccr-22-0383_figure_s1_suppfs1.docx]

**Supplementary Figure S1**

Overall survival among patients diagnosed with metastatic KRAS mutant lung cancer (n=287); time origin is date of initial diagnosis of metastatic disease.


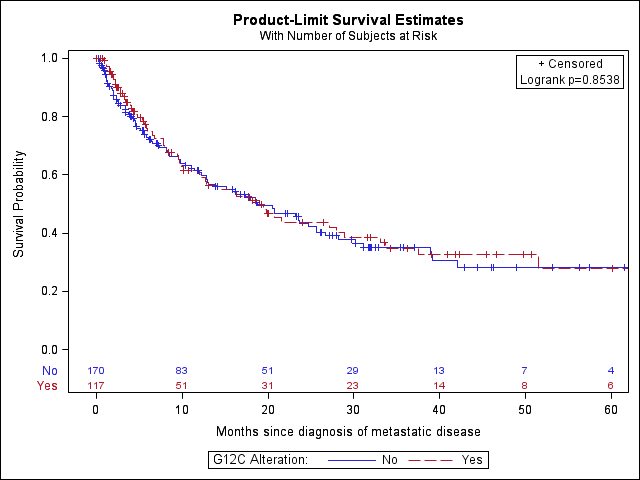


Median OS

G12C: 19.1 months (95% CI 12–29)

Non-G12C: 18.8 months (95% CI 13–26)
