# Supplementary material for: Activity of Adagrasib (MRTX849) in Brain Metastases: Preclinical Models and Clinical Data from Patients with KRASG12C-Mutant Non–Small Cell Lung Cancer
Source: Oxford University Press journal article supplement (doi:10.1158/1078-0432.ccr-22-0383), 2022-04-11
Supplement: ccr-22-0383_figure_s2_suppfs2.docx [file ccr-22-0383_figure_s2_suppfs2.docx]

**Supplementary Figure S2**

Characterization of the anti-tumor effects of selective KRAS G12C inhibitor adagrasib in the H23 (**A**) and the LU65 (**B–E**) brain tumor model *in vivo.* **A.** CSF PK. Adagrasib 100 mg/kg BID was administered to non-tumor-bearing mice (n=3) for 3 days; CSF was collected 6 hours after the last dose. **B-D,** Bioluminescence imaging based evaluation of tumor volume change during and after treatment. **B.** Total flux mid/pre-ratio. **C.** Total flux pre/mid/post-treatment. **D.** Total flux ratio mid/pre, post/pre, post/mid. **E.** % body weight change over time, during and after treatment. For statistical analysis, the Mann-Whitney test was used to compare two groups, and one-way ANOVA with Tukey’s multiple comparison test for three groups. *p≤0.05; **p≤0.01; ***p≤0.001; ****p≤0.0001.

**A B**

**BLI: Vehicle, adagrasib**

**(Mid/Pre ratio)**

Vehicle Adagrasib

**CSF PK (Adagrasib)**

**C**

**BLI; Adagrasib at each timepoint**

**D**

**BLI: Adagrasib**

**(Mid/Pre, Post/Pre, Post/Mid ratio)**

**E**

Adagrasib
