# Supplementary material for: Activity of Adagrasib (MRTX849) in Brain Metastases: Preclinical Models and Clinical Data from Patients with KRASG12C-Mutant Non–Small Cell Lung Cancer
Source: Oxford University Press journal article supplement (doi:10.1158/1078-0432.ccr-22-0383), 2022-04-11
Supplement: ccr-22-0383_figure_s3_suppfs3.docx [file ccr-22-0383_figure_s3_suppfs3.docx]

**Supplementary Figure S3**

Characterization of the anti-tumor effects of selective KRAS G12C inhibitors in the H23 brain tumor model *in vivo*. **A.** Experimental schematic of drug efficacy study in the intracranial H23 model. **B**. Bioluminescence imaging of H23 tumors in mice before and after 3 weeks of daily drug treatment. **C.** Total flux post/pre ratio. **D.** Total flux follow-up/pre ratio. **E.** Total flux follow-up/post ratio. **F.** Probability of survival in the H23 intracranial model (p=0.26 by log-rank test). **G**. Representative microscopic images of immunohistochemistry for Ki-67 and p-ERK in intracranial H23 tumors after 2-day treatment of mice. **H**. Quantification of % positivity of Ki-67 and p-ERK immunohistochemistry. The Mann-Whitney test was used for comparison.

**A**

**
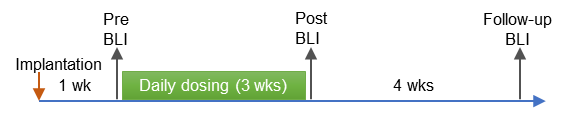
**

**B C**

**Adagrasib**

**Adagrasib**

Vehicle


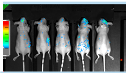

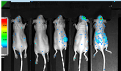


Pre


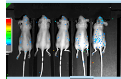

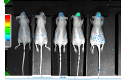

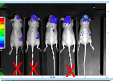

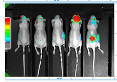


3 wks

3 wks


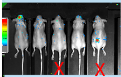

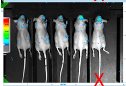


Post

Adagrasib

**D E F**

Adagrasib

**Adagrasib**

**Adagrasib**

**G**


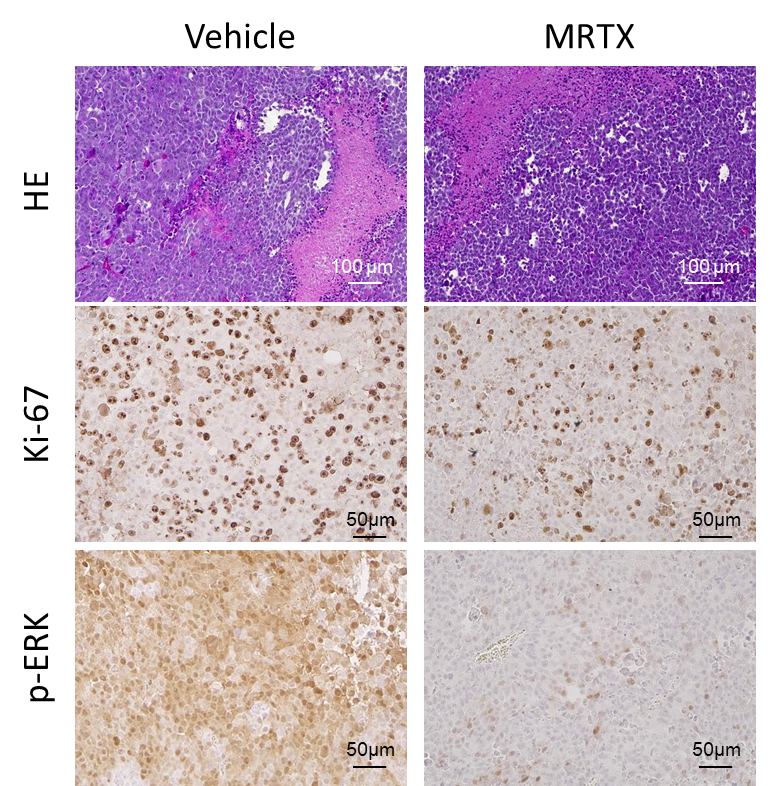


Adagrasib

**H**

**Vehicle Adagrasib**

**Vehicle Adagrasib**
